# Supplementary material for: Bisphenol A and cancer: a critical review of the epidemiologic literature with an emphasis on exposure assessment
Source: Research Square preprint supplement (doi:10.21203/rs.3.rs-6742025/v1), 2025-06-30
Supplement: Supplementary file 1 [file 1460623d3c5be25666381e2b.docx]

**APPENDIX/SUPPLEMENTAL FILE**

**Appendix Table 1. Literature search strategy in PECO format**

| **Set #** | **Search Terms** | **Results** | **PECO Group** |
| --- | --- | --- | --- |
| 1 | "Bisphenol A"[nm] OR 80-05-7[rn] OR 201-245-8[rn] OR "Bisfenol A"[tiab] OR "Bisphenol A"[tiab] OR "BPA"[tiab] OR "4,4'-(Propane-2,2-diyl)diphenol"[tiab] OR "4,4’-Propane-2,2-diyldiphenol"[tiab] OR "Phenol, 4,4'-(1-methylethylidene)bis-"[tiab] OR "2,2-Bis(4-hydroxyphenyl)propane"[tiab] OR "2,2-Bis(4'-hydroxyphenyl) propane"[tiab] OR "2,2'-Bis(4-hydroxyphenyl)propane"[tiab] OR "2,2-BIS-(4-HYDROXY-PHENYL)-PROPANE"[tiab] OR "2,2-Bis(p-hydroxyphenyl)propane"[tiab] OR "2,2-Di(4-Hydroxyphenyl) Propane"[tiab] OR "2,2-DI(4-HYDROXYPHENYL)PROPANE"[tiab] OR "2,2-Di(4-phenylol)propane"[tiab] OR "4,4'-(1-Methylethylidene)bisphenol"[tiab] OR "4,4'-Bisphenol A"[tiab] OR "(4,4'-Dihydroxydiphenyl)dimethylmethane"[tiab] OR "4,4'-DIHYDROXYPHENYL-2,2-PROPANE"[tiab] OR "4,4'-isopropilidendifenol"[tiab] OR "4,4'-Isopropylidendiphenol"[tiab] OR "4,4'-Isopropylidene bisphenol"[tiab] OR "4,4'-Isopropylidenebis[phenol]"[tiab] OR "4,4'-isopropylidenediphenol"[tiab] OR "4,4-ISOPROPYLIDENE DIPHENYL"[tiab] OR "4,4'-Methylethylidenebisphenol"[tiab] OR "Bis(4-hydroxyphenyl)dimethylmethane"[tiab] OR "BIS[PHENOL], 4,4'-(1-METHYLETHYLIDENE)-"[tiab] OR "BISPHENOL, 4,4'-(1-METHYLETHYLIDENE)-"[tiab] OR "Bisphenol-A"[tiab] OR "Bis(p-hydroxyphenyl)propane"[tiab] OR "Diphenol methylethylidene"[tiab] OR "Diphenylolpropane"[tiab] OR "Hidorin F 285"[tiab] OR "Isopropylidenebis(4-hydroxybenzene)"[tiab] OR "NSC 1767"[tiab] OR "NSC 17959"[tiab] OR "Parabis"[tiab] OR "Parabis A"[tiab] OR "Phenol, 4,4'-isopropylidenedi-"[tiab] OR "Pluracol 245"[tiab] OR "p,p'-Bisphenol A"[tiab] OR "p,p'-Dihydroxydiphenylpropane"[tiab] OR "p,p'-Isopropylidenebisphenol"[tiab] OR "p,p'-Isopropylidenediphenol"[tiab] OR "P,P'-ISOPROPYLIDENE DIPHENOL"[tiab] OR "Rikabanol"[tiab] OR "β,β'-Bis(p-hydroxyphenyl)propane"[tiab] OR 2444-90-8[rn] OR "Bisphenol A disodium salt"[tiab] OR "Disodium 4,4'-isopropylidenediphenolate"[tiab] OR "Disodium 4,4'-(propane-2,2-diyl)diphenolate"[tiab] OR "Phenol, 4,4'-(1-methylethylidene)bis-, disodium salt"[tiab] OR "Phenol, 4,4'-(1-methylethylidene)bis-, sodium salt (1:2) "[tiab] OR 94006-29-8[rn] OR "Barium(2+) 4,4'-isopropylidenebisphenolate"[tiab] OR "Barium 4,4'-(propane-2,2-diyl)diphenolate"[tiab] OR "Phenol, 4,4'-(1-methylethylidene)bis-, barium salt (1:1)"[tiab] | 13836 | Exposure: Bisphenol A Terms |
| 2 | cancer[sb] | 6,886,274 | Outcome: PubMed Cancer Filter |
| 3 | (("Epidemiologic Studies"[mh] OR "epidemiology"[sh] OR "Meta-Analysis"[pt] OR “Case Report”[pt] OR workmen*[tiab] OR Worker*[tiab] OR Seroepidemiologic-Stud*[tiab] OR retrospective-stud*[tiab] OR prospective-stud*[tiab] OR Mortality[tiab] OR longitudinal-stud*[tiab] OR follow-up stud*[tiab] OR ecological-study[tiab] OR ecological-studies[tiab] OR Cross-Sectional Stud*[tiab] OR Correlation-stud*[tiab] OR cohort*[tiab] OR case-control*[tiab] OR cancer-registr*[tiab] OR case-series[tiab] OR case-referent[tiab] OR record-link*[tiab])) OR ((metaanalysis[tiab] OR case-report[tiab] OR metaanalyses[tiab] OR meta-analysis[tiab]) NOT medline[sb]) | 5,550,034 | Population: RoC Human Epidemiological Studies Strategy  Comparator: General population, not or low exposed to BPA |
| 7 | #1 AND #2 AND #3 | 235 | Combine BPA + Cancer + Human Epi |

**Appendix Table 2. Potential confounders for BPA and cancers of the breast and prostate by cancer site**

| **Cancer site and Potential Confounders** | **Risk factors** | **References** |
| --- | --- | --- |
| **Cancer:** Breast  **Potential Confounders:** Obesity, tobacco smoke exposure, race/ethnicity, age | Established: Alcohol consumption, ionizing radiation, estrogen-progestogen oral contraceptives (combined), estrogen-progestogen menopausal therapy (combined), diethylstilbestrol, age, race/ethnicity, low physical activity, overweight/obese status, early menarche, late menopause, post-menopausal status, tall height, breast density, greater birthweight, not breast feeding, not having children/parity, genetic risk factors (mutations in BRCA1, BRCA2, PALB2, TP53, PTEN), family history  IARC limited evidence: dieldrin, aldrin metabolized to dieldrin, digoxin, postmenopausal estrogen therapy, ethylene oxide, night shift work, polychlorinated biphenyls, tobacco smoking | (ACS 2021a, b; Carwile and Michels 2011; Do et al. 2017; Geens et al. 2014; IARC 2019; Lakind and Naiman 2011; Liu et al. 2017; Trasande et al. 2012; Wang et al. 2012; WCRF 2022c; Wu et al. 2020) |
| **Cancer:** Prostate  **Potential Confounders:** Obesity, age, race/ethnicity | Established: Age, race/ethnicity, family history of prostate cancer, genetic markers (BRCA1, BRCA2, Lynch Syndrome), overweight/obesity, tall height, geographical location  IARC limited evidence: androgenic (anabolic) steroids, arsenic and inorganic arsenic compounds, cadmium and cadmium compounds, firefighting, malathion, night shift work, red meat consumption, rubber manufacturing industry, thorium-232 and its decay products, X- and gamma-radiation | (ACS 2020; Carwile and Michels 2011; Do et al. 2017; IARC 2019; Lakind and Naiman 2011; Liu et al. 2017; Trasande et al. 2012; Wang et al. 2012; WCRF 2022b; Wu et al. 2020) |

**Appendix – Descriptions of cancer sites other than breast and prostate (ordered by ICD code)**

The following sections describe studies of BPA and cancer sites that were not presented in the main text. Details of these studies can be found in Appendix Table 3.

## A.1 Colorectal cancer

BPA was associated with colorectal cancer (CRC) in two hospital-based case-control studies from China; however, both studies were limited by a single measurement of BPA in urine collected after cancer diagnosis. Deng et al. (2021) reported positive associations with BPA in both continuous and categorical analyses (OR, 1.58; 95% CI: 1.40–1.79 per μ/g unit increment and 2.58; 95% CI: 1.88–3.55 for those with high compared to low BPA levels) and in high-BPA individuals with the TC/CC genotypes of the rs2296147 allele or the GC/CC genotypes of the rs17655 allele of the *ERCC5* gene compared to low-BPA subjects with the TT or GG genotypes. The *ERCC5* gene encodes a DNA repair gene; alterations in DNA repair capacity can contribute to tumorigenesis (Smith et al. 2020). Hong et al. (2022) reported an OR of 4.45 (95% CI: 1.31–15.14) for the highest tertile of BPA. BPA exposure was also correlated with several serum tumor markers.

## A.2 Extrahepatic bile duct/gallbladder cancers

Occupational BPA exposure was associated with a combined category of gallbladder carcinoma, cancer of the extrahepatic bile duct, and cancer of the ampulla of Vater (OR, 2.1; 95% CI: 1.0–4.3) in a case-control study in men in six European countries (Ahrens et al. 2007). Limitations were the use of a JEM in a population-based setting and only 9 exposed cases.

## A.3 Lung cancer

BPA exposure was associated with lung cancer in two hospital-based case-control studies from China. Both were limited by collection of a single spot urine sample. In Wuhan, non-small cell lung cancer (NSCLC) was associated with urinary BPA levels above 1.32 μg/g compared to those with BPA levels ≤0.29 μg/g (OR, 1.91; 95% CI: 1.39–2.62; 257 cases) (Li et al. 2020). There was also an increased risk for those with high levels of BPA carrying a variant allele in a gene that regulates estrogen signaling (rs2046210 at 6q25.1; located upstream of the estrogen receptor-1 gene), but not those with the homozygote wild type genotype.

In Quzhou, positive associations of BPA levels with lung cancer were observed when analyzing exposure as a continuous variable (OR per μg/g unit increase in BPA, 1.28; 95% CI: 1.17–1.40; *p-*value for trend: 0.04) (Qu et al. 2022). Compared with the reference group, increased risks were also observed in the second, third, and fourth quartiles. When stratified by sex, a statistically significant OR was observed in the highest tertile in men, but ORs were not statistically significant in women.

A small cross-sectional study from South Korea (Pamungkas et al. 2016) did not present a risk estimate, but did report significantly higher serum BPA concentrations in lung cancer cases compared to controls (p < 0.05).

## A.4 Bone cancer

A hospital-based case-control study in Wuhan, China found an association between urinary BPA levels above 7.01 ng/ml with risk of osteosarcoma overall (OR: 1.41; 95% CI: 1.01–1.72; 63 cases), osteosarcoma affecting the hip (OR: 2.00; 95% CI: 1.30–3.17; 22 cases), and osteosarcoma affecting the knee (OR: 1.66; 95% CI: 1.14–2.49; 36 cases) (Jia et al. 2013). A significantly increased risk of osteosarcoma was also observed in those with high BPA levels that carried a variant LOX allele, a gene related to the development of osteosarcoma, compared to participants without the polymorphism and low BPA; those with the CC homozygote variant genotype had the highest risk. Cases and controls were matched by age and sex, but analyses did not adjust for additional confounders. There were severe limitations in the reporting and analysis of this study. The BPA analyte was not specified, a single sample was collected without further specification of timing or details (e.g., spot, first morning void), no reporting of QC measures, a relatively high LOD, and the number of samples below the LOD was not reported. Additionally, the study did not specify which analyte was measured or the type of urine sample collected.

## A.5 Melanoma

In a cross-sectional analysis using NHANES data from 2005 to 2016, Cathey et al. (2023) reported ORs of 0.68 (95% CI: 0.33–1.40) in men and 0.99 (95% CI: 0.53–1.83) in women.

## A.6 Cervical cancer

Two cross-sectional studies reported on the association between BPA exposure and cervical cancer (Medellín-Garibay et al. 2023; Morgan et al. 2016). Among NHANES participants, the OR was 1.33 (95% CI: 0.42–4.18) among those with urinary BPA ≥50% from spot samples compared to the reference group (LOD to 50th percentile) (Morgan et al. 2016). [Cancer diagnoses were self-reported in this study and there is the potential for outcome misclassification.] A study from Mexico did not report risk estimates but reported higher BPA concentrations (from first morning voids, creatinine adjusted) in controls than in cases (Medellín-Garibay et al. 2023).

## A.7 Endometrial/uterine cancer

There were five reports of BPA and endometrial/uterine cancer (Aquino et al. 2019; Cathey et al. 2023; Hiroi et al. 2004; Morgan et al. 2016; Sarink et al. 2021), with four of cross-sectional design (Table 2). A case-control study of post-menopausal endometrial cancer nested within the Multiethnic Cohort reported an OR of 1.21 (95% CI, 0.6–2.44; 50 exposed cases) for the highest tertile of BPA exposure (Sarink et al. 2021). BPA was prospectively measured in a single urine sample collected at enrollment; cancer was diagnosed a median of 6.6 years later. This study was limited by the use of single spot urine samples collected at various times (though collection timing was controlled for in analyses) and high within-batch variability (22%).

Two cross-sectional studies compared BPA levels between endometrial cancer patients and controls but did not report risk estimates (Aquino et al. 2019; Hiroi et al. 2004). Serum BPA levels were lower in endometrial cancer patients than controls in Japan (Hiroi et al. 2004), but were similar in Italy (Aquino et al. 2019). The Italian study also observed that BPA levels in endometrial cancer patients compared to controls were higher in urine, but lower in endometrial tissue (Aquino et al. 2019).

Two cross-sectional analyses using NHANES data reported on uterine cancer, using data from 1999-2004 (Morgan et al. 2016) and 2005-2016 (Cathey et al. 2023). Morgan et al. (2016) reported an OR of 0.57 (95% CI: 0.25–1.29) among those with urinary BPA ≥50% from spot samples compared to a reference group of BPA levels of LOD to 50%. Cathey et al. (2023) reported an OR of 0.87 (95% CI: 0.51–1.48) per IQR increase in BPA. Limitations were the potential for outcome misclassification from self-report of cancer and reverse causation due to the cross-sectional design. [‘Uterine cancer’ likely refers to endometrial cancer in these studies uterine sarcomas are very rare (NCI 2024).]

## A.8 Ovarian cancer

Two cross-sectional analyses using NHANES data reported on ovarian cancer, using data from 1999-2004 (Morgan et al. 2016) and 2005-2016 (Cathey et al. 2023). Morgan et al. (2016) reported an OR of 1.41 (95% CI: 0.30–6.70) among those with urinary BPA ≥50% from spot samples compared to a reference group of BPA levels of LOD to 50%. Cathey et al. (2023) reported an OR of 1.93 (95% CI: 1.11–3.35) per IQR increase in BPA. Limitations were the potential for outcome misclassification from self-report of cancer and reverse causation due to the cross-sectional design.

## A.9 Bladder cancer

In a Spanish case-control study of molecular markers for bladder cancer, urinary BPA levels were higher in cancer patients compared to controls (*p* < 0.01), although risk estimates were not calculated (Martin-Way et al. 2022).

## A.10 Eye cancer

A multicenter case-control study of uveal melanoma from nine European countries reported an OR of 0.67 (95%CI, 0.29–1.56) for ever being exposed to BPA, as assessed through a JEM (Behrens et al. 2012). Limitations were the use of a JEM in a population-based setting and only 6 exposed cases.

## A.11 Brain cancer

A hospital-based case-control study of meningioma in Wuhan, China observed associations with all quartiles of urinary BPA levels (OR for quartile 4, 1.57; 95% CI: 1.12–2.09) with a significant exposure-response trend (p-value, 0.003) (Duan et al. 2013). Positive associations were observed in the highest quartile, regardless of BMI or HRT use. However, this study was limited by collection of a single urine sample, with no adjustment for urine volume, as well as the lack of reporting of QC measures and LOD.

## A.12 Thyroid cancer

Six cross-sectional studies of BPA and thyroid cancer were identified, three of which reported positive associations (Cathey et al. 2023; Chowdhury et al. 2016; Marotta et al. 2019; Marotta et al. 2023; Zhang et al. 2023; Zhou et al. 2017) (Table 2). Zhang et al. (2023) adjusted for age and obesity, while Zhou et al. (2017) adjusted only for age and Marotta et al. (Marotta et al. 2019; Marotta et al. 2023) reported only crude estimates. All studies are limited by a cross-sectional design and the collection of a single biological sample. Chowdhury et al. (2016) reported higher urinary (but not serum) BPA levels in papillary thyroid cancer patients than controls but did not report a risk estimate. A cross-sectional analysis of NHANES data from 2005-2016 reported an OR of 0.62 (95% CI: 0.20 – 1.90) per IQR increase in women (Cathey et al. 2023). Two studies of papillary thyroid carcinoma from China measured BPA in urine. In Shandong Province, Zhou et al. (2017) reported an OR of 3.57 (95% CI: 1.37–9.3) associated with the highest exposure category (>2.84 ng/ml). BPA was also measured in serum, but these analyses were not presented. The study was limited by lack of reporting of how samples below LOD (17%) were treated. In Beijing, Zhang et al. (2023) reported an OR of 0.38 (95% CI: 0.19–0.77) per ln-unit increase in BPA level. An inverse association was also observed in analyses of only female non-smokers.

Two studies compared serum BPA levels in patients with differentiated thyroid carcinoma to controls with benign thyroid nodules in Italy. Marotta et al. (2019) reported a crude OR of 3.71 (95% CI: 0.67–20.34). No QC measures or LOD were reported, and participants without detectable levels of BPA and other chemicals were excluded from analyses. A later study performed in different patients in the same region in Italy reported an increased crude OR of 5.3 (95% CI: 1.07–26.18) in patients with a BMI ≥25 kg/m2 exposed to BPA versus unexposed (Marotta et al. 2023). The association was not significant in patients with a BMI <25 kg/m2. Unlike the earlier study, this study reported the LOD, LOQ, and QC measures.

## A.13 Lymphohematopoietic cancer

In a multi-center case-control study of lymphoma and its subtypes conducted in six European countries (Epilymph) (Costas et al. 2015), the OR between ever exposure to BPA and lymphoma or its subtypes was 1.55 (95% CI: 0.78–3.08; 19 cases). A JEM was used to determine probability of occupational exposure to BPA and other chemicals, which doesn’t capture the primary exposure route (diet). This study was limited by the small number of participants exposed to BPA, which reduces the power to detect an effect.

## A.14 All cancer mortality

In a cohort analysis using the NHANES dataset, BPA was not associated with all cancer mortality (HR for tertile 3 of BPA levels was 0.98 (95%CI, 0.4–2.39)) after adjustment for several confounders (Bao et al. 2020). BPA was measured in spot urine samples collected between 2003 and 2008 at enrollment into the cohort and linked to mortality data that was obtained through 2015 (median follow-up time of 9.6 years). This study was limited by the collection of a single spot urine sample. An earlier cross-sectional analysis of NHANES data for samples collected from 2003–2004 reported an OR of 1.14 (95% CI: 0.86–1.52) (Lang et al. 2008). There is potential for outcome misclassification from the use of death certificates.

**Appendix Table 3. Epidemiological studies of BPA and cancers other than the breast and prostate**

| **Reference; Location;  Years of BPA measurement; Study design** | **Cancer site/type** | **Exposure assessment details**** | **Analytical method and analyte1** | | | | | **BPA levels** | | **LOD or LOQ (% below LOD) and method for samples below LOD/LOQ** | | **Methods to limit contamination?**  **QC measures?** | | **Main results** | | | **Comments** | | |
| --- | --- | --- | --- | --- | --- | --- | --- | --- | --- | --- | --- | --- | --- | --- | --- | --- | --- | --- | --- |
| **Exposure category or level** | **Risk estimate (95% CI)** | **Exposed cases** |  | | |
| Deng et al. (2021)  China  2016–2019  Case-Control | Colorectum | Urine: spot sample | Method: UPLC-MS  **Analyte**: NR | | | | | Median (ng/mg): 1.43 (cases), 0.70 (controls) | | LOD/LOQ: NR (<5%)  Methods: Included in reference group | | Limit contamination: NR  QC: NR | | OR, BPA (μg/g Cr) | | |  | | |
| Per unit increment | 1.58 (1.40–1.79) | 275 |
| <0.70 | 1 | 77 |
| >0.70 | 2.58 (1.88–3.55) | 198 |
| Hong et al. (2022)  China  2017–2019  Case-Control | Colorectum | Urine: first morning void sample | Method: LC-MS/MS  **Analyte**: NR | | | | | Median (ng/mg): 1.92 (cases), 1.65 (controls) | | LOD (ng/ml): 0.1 (0.5%)  Methods: Included in reference group | | Limit contamination: Yes  QC: Yes | | OR, BPA (μg/g Cr) | | |  | | |
| <1.12 | 1 | NR |
| 1.12 – 3.67 | 1.74 (0.48–6.35) | NR |
| >3.67 | 4.45 (1.31–15.14) | NR |
| Trend-test *p*-value: 0.017 | | |
| Tertile 1 | 1 | 44 |
| Tertile 2 | 0.86 (0.44–1.67) | 45 |
| Tertile 3 | 1.21 (0.60–2.44) | 50 |
| Trend-test *p*-value: 0.50 | | |
| Ahrens et al. (2007)  Denmark, France, Germany, Italy, Sweden, Spain  1995–1997  Case-Control | Extrahepatic biliary tract | JEM: job specific questionnaires | | | | | | |  | | NA | | NA | OR | | | Analyses based on few exposed subjects. Did not account for non-occupational exposure. Non-differential exposure misclassification is possible, likely bias towards the null. | | |
| Never | 1 | NR |
| Ever | 2.1 (1.0–4.3) | 9 |
| Pamungkas et al. (2016)  South Korea  2004  Cross-Sectional | Lung | Serum sample | Method: UPLC-MS/MS  **Analyte**: NR | | | | | NR | | NR | | Limit contamin-ation: NR  QC: NR | | No risk estimate | | |  | | |
| Li et al. (2020)  China  2016–2018  Case-Control | Lung (non-small cell) | Urine: spot sample | Method: HPLC-MS  **Analyte**: Total without deconjugated BPA-S | | | | | Median (ng/mg): 0.97 (cases), 0.73 (controls), | | LOD (ng/ml): 0.031 (2.8% cases, 1.6% controls)  Methods: imputed as the LOD/√2 | | Limit contamin-ation: NR  QC: Yes | | OR, BPA (μg/g Cr) | | | Also reported analyses stratified by sex and smoking, as well as by rs2046210 alleles | | |
| ≤0.39 | 1 |  |
| 0.40–0.73 | 0.83 (0.58–1.17) |  |
| 0.74–1.32 | 0.80 (0.57–1.14) |  |
| >1.32 | 1.91 (1.39–2.62) |  |
| Qu et al. (2022)  China  2020–2021  Case-Control | Lung | Urine: spot sample | Method: UPLC-MS/MS  **Analyte**: total BPA | | | | | Mean (ng/mg): 0.95 (cases), 0.71 (controls) | | LOQ (ng/ml): 0.12 (5% cases, 7% controls)  Methods: Imputed as the LOD/√2 | | Limit contamin-ation: Yes  QC: Yes | | OR, BPA (μg/g Cr) | | |  | | |
| Log-transformed | 1.28 (1.17–1.40) | 469 |
| <0.28 | 1 | NR |
| 0.28–0.43 | 1.13 (1.07–1.36) | NR |
| 0.43–1.0 | 1.27 (1.08–1.55) | NR |
| >1.0 | 1.43 (1.20–1.71) | NR |
| Jia et al. (2013)  China  2009–2011  Case-Control | Osteosarcoma | Urine: spot sample | Method: HPLC-MC  **Analyte**: NR | | | | | Median (ng/ml): 7.01 | | LOD (ng/ml): 0.5 (% NR)  Methods: Imputed as 0.35 ng/ml | | Limit contamin-ation: NR  QC: NR | | Unadjusted OR, BPA (μmol/mol Cr) | | | Also reported ORs for BPA and LOX polymorphisms. Did not control for potential confounders. Small sample size. | | |
| <7.01 | 1 | 43 |  | | |
| ≥7.01 | 1.41 (1.01–1.72) | 63 |
| Cathey et al. (2023)  US (NHANES)  2005–2016  Cross-sectional | Melanoma | Urine: spot sample | Method: HPLC-MS/MS  **Analyte**: total BPA | | | | | Geometric mean (ng/mL): 1.49 (IQR: 2.40) | | LOD/LOQ: NR (men: 6.6%; women: 8.5%)  Methods: Imputed as LOD/√2 | | Reported in NHANES | | OR, BPA (μg/g Cr) | | | **Selection bias:** Large, representative study with high quality exposure assessment. Potential for length-biased sampling due to cross-sectional design.  **Information bias:** Self-reported cancers susceptible to outcome misclassification. | | |
| Men  Per IQR increase | 0.68 (0.33–1.40) | NR |
| Women  Per IQR increase | 0.99 (0.53–1.83) | NR |
| Medellin-Garibay et al. (2023)  Mexico  2019  Cross-sectional | Cervical cancer | Urine: spot sample | Method: UPLC-MS/MS  **Analyte**: NR | | | | | Median (µg/l): 10.4 (controls); 3.1 (cases 1); 1.95 (cases 2) | | LOD: 0.2 µg/l (0%)  Methods: NA | | Limit contamination: NR  QC: Yes | | No risk estimate | | |  | | |
| Morgan et al. (2016)  US (NHANES)  2005–2010  Cross-sectional | Cervix | Urine: spot sample | Method: HPLC-MS/MS  Analyte: Total BPA | | | | | Geometric mean (ng/g): 1.17 (cervical cancer cases), 1.23 (ovarian cancer cases), 1.09 (uterine cancer cases), 1.16 (controls) | | LOD/LOQ: NR  Method: Included in reference group | | Limit contamin-ation: Yes  QC: Yes | | Cervical cancer: OR, BPA (μg/g Cr) | | | **Notes:** reported on uterine, cervical and ovarian cancer.  **Information bias:** Potential for outcome misclassification- cancers were self-reported and there was no verification with ICD codes. Uterine sarcomas are very rare – therefore the self-reported uterine cancers are likely to be endometrial cancers. | | |
| <LOD–50% | 1 | 6 |
| ≥50% | 1.33 (0.42–4.18) | 9 |
| Ovarian cancer: OR, BPA (μg/g Cr) | | |
| <LOD–50% | 1 | 6 |
| ≥50% | 1.41 (0.30–6.70) | 10 |
| Hiroi et al. (2004)  Japan  NR  Cross-sectional | Endometrium | Serum sample | Method: ELISA  Analyte: NR | | | | | Mean (ng/ml): 1.4 (cases), 2.5 (controls) | | LOD/LOQ: NR  Method: NR | | Limit contamination: NR  QC: NR | | No risk estimate. | | | | |  |
| Aquino et al. (2019)  Italy  2016–2017  Cross-sectional | Endometrium | Urine: spot sample; serum sample; endometrial tissue sample | Method: GC-MS/MS | | | | | Median (ng/ml):  Urine: 6.34 (cases), 4.54 (controls)  Serum: 2.01 (cases), 1.48 (controls)  Tissue: 0.08 (cases), 0.26 (controls) | | LOD/LOQ: NR  Method: NR | | Limit contamination: NR  QC: NR | | No risk estimate. | | | | | Strength: Three biological matrices were compared. |
| Morgan et al. (2016)  US (NHANES)  2005–2010  Cross-sectional | Endometrium | Urine: spot sample | Method: HPLC-MS/MS  Analyte: Total BPA | | | | | Geometric mean (ng/g): 1.17 (cervical cancer cases), 1.23 (ovarian cancer cases), 1.09 (uterine cancer cases), 1.16 (controls) | | LOD/LOQ: NR  Method: Included in reference group | | Limit contamination: Yes  QC: Yes | | OR, BPA (μg/g Cr) | | | | | **Notes:** Endometrial cancers were likely self-reported as uterine cancers– uterine sarcomas are very rare.  **Information bias:** Potential for outcome misclassification- cancers were self-reported and there was no verification with ICD codes. |
| <LOD–50% | 1 | 13 | | |
| ≥50% | 0.57 (0.25–1.29) | 9 | | |
| >1.69 | 1.57 (1.12–2.09) | NR | | |
| Trend test *p-*value: 0.003 | | | | |
| Unexposed | 1 | 4 | | |
| Exposed to BPA | 2.86 (0.85–9.55) | 37 | | |
| Sarink et al. (2021)  US  2001–2006  Case-control | Endometrium | Urine: first morning void or overnight sample | Method: LC-HRAM-MS  Analyte: Total BPA | | | | | Median (ng/mg): 1.62 (cases), 1.54 (controls) | | LOD/LOQ: NR (≤8%)  Method: Imputed as LOD/2 | | Limit contamination: NR  QC: NR | | OR, BPA (ng/g Cr) | | | | |  |
| Tertile 1 | 1 | 44 | | |
| Tertile 2 | 0.86 (0.44–1.67) | 45 | | |
| Tertile 3 | 1.21 (0.60–2.44) | 50 | | |
| Trend-test *p*-value: 0.50 | | | | |
| Cathey et al. (2023)  US (NHANES)  2005–2016  Cross-sectional | Endometrium | Urine: spot sample | Method: HPLC-MS/MS  Analyte: Total BPA | | | | | Geometric mean (ng/mL): 1.49 (IQR: 2.40) | | LOD: NR (8.5%)  Methods: Imputed as LOD/√2 | | Reported in NHANES | | OR, BPA (μg/g Cr) | | | | | **Notes:** Endometrial cancers were likely self-reported as uterine cancers– uterine sarcomas are very rare.  **Selection bias:** NHANES is a large, representative study with high quality exposure assessment. Potential for length-biased sampling due to cross-sectional design.  **Information bias:** Self-reported cancers susceptible to outcome misclassification.  **Notes:** Cross-sectional design used to inform hypotheses in emerging cohort studies, not for causal inference. Sensitivity analyses stratified by race/ethnicity and sex to inform future analyses on disparities in associations between environmental exposures and cancer outcomes. |
| Per IQR increase | 0.87 (0.51–1.48) | NR | | |
| Cathey et al. (2023)  US (NHANES)  2005–2016  Cross-sectional | Ovary | Urine: spot sample | Method: HPLC-MS/MS  **Analyte:** Total BPA | | | Geometric mean (ng/mL): 1.49 (IQR: 2.40) | | | | LOD: NR (8.5%)  Methods: Imputed as LOD/√2 | | Reported in NHANES | | Ovarian cancer: OR, BPA (μg/g Cr) | | | **Selection bias:** Large, representative study with high quality exposure assessment. Potential for length-biased sampling due to cross-sectional design.  **Information bias:** Self-reported cancers susceptible to outcome misclassification. | | |
| Per IQR increase | 1.93 (1.11–3.35) | NR |
| Martin-Way et al. (2022)  Spain  NR  Case-Control | Bladder | Urine: spot sample | Method: GC-MS  **Analyte**: NR | | | Median (ng/ml): 17.6 (cases), 3.60 (controls) | | | | NR | | Limit contamin-ation: NR  QC: NR | | No risk estimate | | |  | | |
| Behrens et al. (2012)  Denmark, Latvia, UK, France, Spain, Germany, Italy, Sweden, Portugal  1994–1997  Case-Control | Uveal melanoma | JEM: job specific questionnaires | | | | | Probability, intensity, and duration of exposure | | | | NA | | NA | OR | | | Analyses based on few exposed subjects. Did not account for non-occupational exposures. Non-differential exposure misclassification is possible, likely bias towards the null. No clear distinction between iris and ciliary melanoma was made for some cases. | | |
| Unexposed | 1 | NR |
| Ever exposed | 0.67 (0.29–1.56) | 6 |
| Ever exposed (excluding cancer controls & UK subjects) | 0.96 (0.4–2.27) | 6 |
| Duan et al. (2013)  China  2009–2010  Case-Control | Meningioma | Urine: spot sample | Method: HPLC-MS  **Analyte**: Total BPA* | | Quartiles (ng/ml): <0.53, 0.54–0.91, 0.92–1.69, >1.69 | | | | | NR | | Limit contamination: NR  QC: NR | | OR, BPA (ng/ml) | | | |  | |
| <0.53 | 1 | NR | |
| 0.54–0.91 | 1.4 (1.01–1.86) | NR | |
| 0.92–1.69 | 1.45 (1.03–1.98) | NR | |
| >1.69 | 1.57 (1.12–2.09) | NR | |
| Trend test *p-*value: 0.003 | | | |
| Chowdhury et al. (2016)  China  2015  Cross-Sectional | Thyroid | Urine: spot sample; serum sample | Method: HPLC-MS/MS  **Analyte**: Total BPA | | Range (ng/ml):  Urine: 0.1 – 30.67;  Serum: 4.03 – 13.80 | | | | | LOQ (ng/ml): Urine: 0.1 (17%);  Serum: 0.2 (0%)  Methods: Imputed as 0.05 ng/ml | | Limit contamination: NR  QC: Yes | | No risk estimate | | | |  | |
| Zhou et al. (2017)  China  2013  Cross-Sectional | Thyroid: Papillary carcinoma | Urine: spot sample; serum sample | Method: HPLC-MS/MS  **Analyte**: Total BPA | | Geometric mean (ng/mg):  Urine: 4.68 (cases), 1.06 (controls)  Serum: 7.61 (cases), 7.62 (controls) | | | | | LOQ (ng/ml): Urine: 0.1 (17%); serum: 0.2 (0%)  Methods: NR | | Limit contamination: NR  QC: NR | | OR, BPA (ng/ml) | | | | No OR calculated for serum BPA levels | |
| >2.84 | 3.57 (1.37–9.3) | NR | |
| Marotta et al. (2019) Italy  2017  Cross-sectional | Thyroid: Differentiated carcinoma | Serum sample | Method: LC/FD/UV  **Analyte**: NR | | Median (ng/ml): 666.52 (cases), 763.27 (benign nodules) | | | | | NR | | Limit contamination: NR  QC: NR | | Unadjusted OR | | | | Did not control for potential confounders. Cases were compared to patients with benign thyroid nodules. | |
| Unexposed | 1 | 2 | |
| Exposed | 3.71 (0.67–20.34) | 26 | |
| Marotta et al. (2023)  Italy  2017–2019  Cross-Sectional | Thyroid: Differentiated carcinoma | Serum sample | Method: LC/FD/UV  **Analyte**: NR | | Median (ng/ml): 734.68 | | | | | LOD (ng/ml): 4.34 (17.7%)  Methods: imputed as 0 | | Limit contamination: Yes  QC: NR | | Unadjusted OR | | | | Did not control for potential confounders. Cases were compared to patients with benign thyroid nodules. | |
| Unexposed | 1 | 4 | |
| Exposed | 2.86 (0.85–9.55) | 37 | |
| Cathey et al. (2023)  US (NHANES)  2005–2016  Cross-sectional | Thyroid | Urine: spot sample | Method: HPLC-MS/MS  **Analyte**: Total BPA | | Geometric mean (ng/mL): 1.49 (IQR: 2.40) | | | | | LOD: NR (8.5%)  Methods: Imputed as LOD/√2 | | Reported in NHANES | | OR, BPA (μg/g Cr) | | | | **Selection bias:** Large, representative study with high quality exposure assessment. Potential for length-biased sampling due to cross-sectional design.  **Information bias:** Self-reported cancers susceptible to outcome misclassification. | |
| Per IQR increase | 0.62 (0.20–1.90) | NR | |
| Zhang et al. (2023)  China  2017  Cross-Sectional | Thyroid | Urine: spot sample | Method: UPLC-MS/MS  **Analyte**: NR | | Geometric mean (ng/mg): 0.22 (cases), 0.36 (controls) | | | | | LOQ (ng/ml): 2.0 (0%) | | Limit contamination: NR  QC: Yes | | OR, BPA (μg/g Cr) | | | |  | |
| Per ln-unit change | 0.38 (0.19–0.77) | NR | |
| 0.10 | 1 | NR | |
| 0.39 | 0.37 (0.08–1.66) | NR | |
| 0.41 | 0.05 (0.01–0.34) | NR | |
| Trend-test *p*-value: 0.19 | | | |
| Costas et al. (2015)  Spain, France, Italy, Ireland, Czech Republic  1998–2004  Case-Control | Lymphoid malignancy (ICD-O-3) | JEM: assigned exposure by job title based on probability that occupational exposure exceeded background level | | | | | Ever exposed | | | | NA | | NA | Mature B-cell neoplasms, OR | | | | Low power since very few participants were exposed to BPA. Did not account for non-occupational exposure. Non-differential exposure misclassification possible, likely bias towards the null. | |
| Unexposed | 1 | 588 | |
| Exposed | 1.55 (0.78–3.08) | 19 | |
| Hodgkin lymphoma, OR | | | |
| Unexposed | 1 | 128 | |
| Exposed | 1.46 (0.36–5.89) | 3 | |
| Lang et al. (2008)  US (NHANES)  2003–2004  Cross-Sectional | All cancer mortality | Urine: spot sample | Method: HPLC-MS/MS  **Analyte**: total BPA | Mean (ng/ml): 4.53 (men), 4.88 (women) | | | | | | LOD (ng/ml): 0.36 (8%)  Methods: Imputed as 0.3 ng/ml | | Limit contamination: Yes  QC: Yes | | OR, BPA | | | |  | |
| Per 1 SD increase | 1.14 (0.86–1.52) | 77 | |  | |
| Bao et al. (2020)  US (NHANES)  2003–2008  Cohort | All cancer mortality | Urine: spot sample | Method: HPLC-MS/MS  **Analyte**: total BPA | Medians of tertiles (ng/ml): 0.7, 2.1, 5.7 | | | | | | LOD (ng/ml): 0.36 (2003-2004), 0.40 (2005-2008) (% NR)  Methods: Imputed as the LOD/√2 | | Limit contamination: Yes  QC: NR | | HR, BPA (ng/ml) | | | | Large sample size. Measured BPA in urine prior to outcome, with a median follow-up of 9.6 years. | |
| 0.7 | 1 | 31 | |
| 2.1 | 1.12 (0.48–2.63) | 22 | |
| 5.7 | 0.98 (0.40–2.39) | 22 | |

1 All biomonitoring studies were limited by a single measurement of BPA per biological matrix

2 Adjusted for creatinine, unless otherwise noted

Cr, creatinine

NR, not reported

ELISA, Enzyme linked immunosorbent assay

GC-MS/MS, gas chromatography with tandem mass spectrometry detection

HPLC-MS/MS, High-pressure liquid chromatography with tandem mass spectrometry detection

LC/HRAM-MS, liquid chromatography-high-resolution accurate-mass mass spectrometry

**Appendix references**

ACS. 2019. American Cancer Society: Endometrial Cancer Risk Factors. Available: <https://www.cancer.org/cancer/endometrial-cancer/causes-risks-prevention/risk-factors.html>.

ACS. 2020. American Cancer Society: Prostate Cancer Risk Factors. Available: <https://www.cancer.org/cancer/prostate-cancer/causes-risks-prevention/risk-factors.html>.

ACS. 2021a. American Cancer Society: Breast Cancer Risk Factors You Cannot Change. Available: <https://www.cancer.org/cancer/breast-cancer/risk-and-prevention/breast-cancer-risk-factors-you-cannot-change.html>.

ACS. 2021b. American Cancer Society: Lifestyle-related Breast Cancer Risk Factors. Available: <https://www.cancer.org/cancer/breast-cancer/risk-and-prevention/lifestyle-related-breast-cancer-risk-factors.html>.

Ahrens W, Mambetova C, Bourdon-Raverdy N, Llopis-González A, Guénel P, Hardell L, et al. 2007. Occupational exposure to endocrine-disrupting compounds and biliary tract cancer among men. Scand J Work Environ Health 33:387-396.

Aquino CI, Troisi J, D'Antonio A, Giugliano L, Raffone A, Sarno L, et al. 2019. Endometrial Carcinoma and Bisphenol A: A Pilot Case-Control Study. Biomed J Sci & Tech Res 21:16073-16079.

Bao W, Liu B, Rong S, Dai SY, Trasande L, Lehmler HJ. 2020. Association Between Bisphenol A Exposure and Risk of All-Cause and Cause-Specific Mortality in US Adults. JAMA Netw Open 3:e2011620.

Behrens T, Lynge E, Cree I, Lutz JM, Eriksson M, Guénel P, et al. 2012. Occupational exposure to endocrine-disrupting chemicals and the risk of uveal melanoma. Scand J Work Environ Health 38:476-483.

Carwile JL, Michels KB. 2011. Urinary bisphenol A and obesity: NHANES 2003-2006. Environ Res 111:825-830.

Cathey AL, Nguyen VK, Colacino JA, Woodruff TJ, Reynolds P, Aung MT. 2023. Exploratory profiles of phenols, parabens, and per- and poly-fluoroalkyl substances among NHANES study participants in association with previous cancer diagnoses. J Expo Sci Environ Epidemiol 33:687-698.

Chowdhury SR, Zhenzhen Z, Kamal AHM, Talukder MH. 2016. Exploring the relationship between bisphenol A, iodine and papillary thyroid carcinoma. JCMCTA 27:50-59.

Costas L, Infante-Rivard C, Zock JP, Van Tongeren M, Boffetta P, Cusson A, et al. 2015. Occupational exposure to endocrine disruptors and lymphoma risk in a multi-centric European study. Br J Cancer 112:1251-1256.

Deng Y, He H, Wan H, Shen N, Li J, Zhang S, et al. 2021. Bisphenol A exposure, interaction with genetic variants and colorectal cancer via mediating oxidative stress biomarkers. Environ Pollut 287:117630.

Do MT, Chang VC, Mendez MA, de Groh M. 2017. Urinary bisphenol A and obesity in adults: results from the Canadian Health Measures Survey. Health Promot Chronic Dis Prev Can 37:403-412.

Duan B, Hu X, Zhao H, Qin J, Luo J. 2013. The relationship between urinary bisphenol A levels and meningioma in Chinese adults. Int J Clin Oncol 18:492-497.

Geens T, Bruckers L, Covaci A, Schoeters G, Fierens T, Sioen I, et al. 2014. Determinants of bisphenol A and phthalate metabolites in urine of Flemish adolescents. Environ Res 134:110-117.

Hiroi H, Tsutsumi O, Takeuchi T, Momoeda M, Ikezuki Y, Okamura A, et al. 2004. Differences in serum bisphenol a concentrations in premenopausal normal women and women with endometrial hyperplasia. Endocr J 51:595-600.

Hong X, Wang G, Liu X, Wu M, Zhang X, Hua X, et al. 2022. Lipidomic biomarkers: Potential mediators of associations between urinary bisphenol A exposure and colorectal cancer. J Hazard Mater 427:127863.

IARC. 2019. List of Classifications by cancer sites with sufficient or limited evidence in humans, Volumes 1 to 124. Lyon, France. Available: <https://monographs.iarc.fr/wp-content/uploads/2019/07/Classifications_by_cancer_site.pdf>.

Jia J, Tian Q, Liu Y, Shao ZW, Yang SH. 2013. Interactive effect of bisphenol A (BPA) exposure with -22G/C polymorphism in LOX gene on the risk of osteosarcoma. Asian Pac J Cancer Prev 14:3805-3808.

Lakind JS, Naiman DQ. 2011. Daily intake of bisphenol A and potential sources of exposure: 2005-2006 National Health and Nutrition Examination Survey. J Expo Sci Environ Epidemiol 21:272-279.

Lang IA, Galloway TS, Scarlett A, Henley WE, Depledge M, Wallace RB, et al. 2008. Association of urinary bisphenol A concentration with medical disorders and laboratory abnormalities in adults. Jama 300:1303-1310.

Li J, Ji Z, Luo X, Li Y, Yuan P, Long J, et al. 2020. Urinary bisphenol A and its interaction with ESR1 genetic polymorphism associated with non-small cell lung cancer: findings from a case-control study in Chinese population. Chemosphere 254:126835.

Liu B, Lehmler HJ, Sun Y, Xu G, Liu Y, Zong G, et al. 2017. Bisphenol A substitutes and obesity in US adults: analysis of a population-based, cross-sectional study. Lancet Planet Health 1:e114-e122.

Marotta V, Russo G, Gambardella C, Grasso M, La Sala D, Chiofalo MG, et al. 2019. Human exposure to bisphenol AF and diethylhexylphthalate increases susceptibility to develop differentiated thyroid cancer in patients with thyroid nodules. Chemosphere 218:885-894.

Marotta V, Grumetto L, Neri I, Russo G, Tortora A, Izzo G, et al. 2023. Exposure to Bisphenol A increases malignancy risk of thyroid nodules in overweight/obese patients. Environ Pollut 316:120478.

Martin-Way D, Puche-Sanz I, Cozar JM, Zafra-Gomez A, Gomez-Regalado MDC, Morales-Alvarez CM, et al. 2022. Genetic variants of antioxidant enzymes and environmental exposures as molecular biomarkers associated with the risk and aggressiveness of bladder cancer. Sci Total Environ 843:156965.

Medellín-Garibay SE, Alcántara-Quintana LE, Rodríguez-Báez AS, Sagahón-Azúa J, Rodríguez-Aguilar M, Hernández Cueto MLA, et al. 2023. Urinary phthalate metabolite and BPA concentrations in women with cervical cancer. Environ Sci Pollut Res Int 30:21033-21042.

Morgan M, Deoraj A, Felty Q, Yoo C, Roy D. 2016. Association between Exposure to Estrogenic Endocrine Disruptors - Polychlorinated Biphenyls, Phthalates, and Bisphenol A and Gynecologic Cancers- Cervical, Ovarian, Uterine Cancers. J Carcinog Mutagen 7:275.

NCI. 2024. Uterine Cancer - Patient Version. Available: <https://www.cancer.gov/types/uterine>, accessed on June 14 2024.

Ning G, Bi Y, Wang T, Xu M, Xu Y, Huang Y, et al. 2011. Relationship of urinary bisphenol A concentration to risk for prevalent type 2 diabetes in Chinese adults: a cross-sectional analysis. Ann Intern Med 155:368-374.

Pamungkas AD, Park C, Lee S, Jee SH, Park YH. 2016. High resolution metabolomics to discriminate compounds in serum of male lung cancer patients in South Korea. Respir Res 17:100.

Provvisiero DP, Pivonello C, Muscogiuri G, Negri M, de Angelis C, Simeoli C, et al. 2016. Influence of Bisphenol A on Type 2 Diabetes Mellitus. Int J Environ Res Public Health 13.

Qu J, Mao W, Liao K, Zhang Y, Jin H. 2022. Association between urinary bisphenol analogue concentrations and lung cancer in adults: A case-control study. Environ Pollut 315:120323.

Sarink D, Franke AA, White KK, Wu AH, Cheng I, Quon B, et al. 2021. BPA, Parabens, and Phthalates in Relation to Endometrial Cancer Risk: A Case-Control Study Nested in the Multiethnic Cohort. Environ Health Perspect 129:57702.

Smith MT, Guyton KZ, Kleinstreuer N, Borrel A, Cardenas A, Chiu WA, et al. 2020. The Key Characteristics of Carcinogens: Relationship to the Hallmarks of Cancer, Relevant Biomarkers, and Assays to Measure Them. Cancer Epidemiol Biomarkers Prev 29:1887-1903.

Sun Q, Cornelis MC, Townsend MK, Tobias DK, Eliassen AH, Franke AA, et al. 2014. Association of urinary concentrations of bisphenol A and phthalate metabolites with risk of type 2 diabetes: a prospective investigation in the Nurses' Health Study (NHS) and NHSII cohorts. Environ Health Perspect 122:616-623.

Trasande L, Attina TM, Blustein J. 2012. Association between urinary bisphenol A concentration and obesity prevalence in children and adolescents. Jama 308:1113-1121.

Vandenberg LN, Hauser R, Marcus M, Olea N, Welshons WV. 2007. Human exposure to bisphenol A (BPA). Reprod Toxicol 24:139-177.

Wang T, Li M, Chen B, Xu M, Xu Y, Huang Y, et al. 2012. Urinary bisphenol A (BPA) concentration associates with obesity and insulin resistance. J Clin Endocrinol Metab 97:E223-227.

WCRF. 2022a. World Cancer Research Fund International: Endometrial cancer. Available: <https://www.wcrf.org/diet-activity-and-cancer/cancer-types/endometrial-cancer/>.

WCRF. 2022b. World Cancer Research Fund International: Prostate cancer. Available: <https://www.wcrf.org/diet-activity-and-cancer/cancer-types/prostate-cancer/>.

WCRF. 2022c. World Cancer Research Fund International: Breast cancer. Available: <https://www.wcrf.org/diet-activity-and-cancer/cancer-types/breast-cancer/>.

Wu W, Li M, Liu A, Wu C, Li D, Deng Q, et al. 2020. Bisphenol A and the Risk of Obesity a Systematic Review With Meta-Analysis of the Epidemiological Evidence. Dose Response 18:1559325820916949.

Zhang L, Zhang J, Fan S, Zhong Y, Li J, Zhao Y, et al. 2023. A case-control study of urinary concentrations of bisphenol A, bisphenol F, and bisphenol S and the risk of papillary thyroid cancer. Chemosphere 312:137162.

Zhou Z, Zhang J, Jiang F, Xie Y, Zhang X, Jiang L. 2017. Higher urinary bisphenol A concentration and excessive iodine intake are associated with nodular goiter and papillary thyroid carcinoma. Biosci Rep 37.
